# Supplementary material
Source: Springer Nature journal article supplement (https://www.springermedizin.de/resource/supplementary/12885_2014_5123_MOESM2_ESM.pdf/9468192)
Supplement: MOESM2 [file 9468192]

Participants of Cancer Screening Cohort at NCC  
from August, 2002-December, 2010 (n=22,085)

Followed-up  
Until December 31<sup>st</sup>, 2010

Potential Cases with  
Thyroid Cancer  
(n=258)

Potential Controls  
(n=21,827)

1 Cases were excluded  
• Death (n=1)

11,834 Controls were excluded

- Death (n=149)
- Missing questionnaire (n=1,334)
- History of Cancer (n=1,264)
- Thyroid disease (n=977)
- Thyroid surgery (n=37)
- Thyroid-related medicine (n=28)

Cases with  
Thyroid Cancer  
(n=257)

Matched Controls  
(n=257)
